# Supplementary material for: An Exercise Intervention to Unravel the Mechanisms Underlying Insulin Resistance in a Cohort of Black South African Women: Protocol for a Randomized Controlled Trial and Baseline Characteristics of Participants
Source: PubMed Central journal article supplement (PMC5932332; doi:10.2196/resprot.9098), 2018-04-18
Supplement: resprot_v7i4e75_app1.pdf [file resprot_v7i4e75_app1.pdf]

**Multimedia Appendix 1:** Focus group discussion open-ended guide questions

| <b>Number</b>                           | <b>Question</b>                                                                                                                                                           |
|-----------------------------------------|---------------------------------------------------------------------------------------------------------------------------------------------------------------------------|
| 1                                       | Can you please briefly share with us what you have been up to since we last saw you?                                                                                      |
| 2                                       | What is the first thing that comes to mind when you hear the word ‘exercise’?                                                                                             |
| 3                                       | What are your perceptions about exercise?                                                                                                                                 |
| 4                                       | What are some of the things that influenced you to attend the exercise sessions?, this can either be barriers or motivating factors.                                      |
| 5                                       | What did you like the most the exercise sessions?                                                                                                                         |
| 6                                       | What did you not like much about the exercise sessions?                                                                                                                   |
| 7                                       | How did the exercise training affect your daily life?                                                                                                                     |
| 8                                       | What did your friends and family have to say when they found out that you are exercising?                                                                                 |
| 9                                       | Is there anything that could be changed about the exercise training sessions to encourage you to continue exercising and for your friends and family to start exercising? |
| 10                                      | Of all the questions that were discussed today, is there one which you feel was the most important to you?                                                                |
| <b>Key Informant Interview Question</b> |                                                                                                                                                                           |
| 1                                       | How did you experience the exercise sessions?                                                                                                                             |
