# Supplementary material for: An Exercise Intervention to Unravel the Mechanisms Underlying Insulin Resistance in a Cohort of Black South African Women: Protocol for a Randomized Controlled Trial and Baseline Characteristics of Participants
Source: PubMed Central journal article supplement (PMC5932332; doi:10.2196/resprot.9098), 2018-04-18
Supplement: resprot_v7i4e75_app2.pdf [file resprot_v7i4e75_app2.pdf]

**Multimedia Appendix 2:** Adipose tissue genes of interest

| <b>GENES</b>                                                         | <b>ID</b>     |
|----------------------------------------------------------------------|---------------|
| LDL receptor related protein (LRP10)                                 | Hs00204094_m1 |
| Ribosomal protein lateral stalk subunit PO (RPLPO)                   | Hs99999902_m1 |
| Peroxisome proliferator-activated receptor gamma<br>(PPAR $\gamma$ ) | Hs01115513_m1 |
| Lipoprotein lipase (LPL)                                             | Hs00173425_m1 |
| Diacylglycerol O- acyltransferase 2 (DGAT2)                          | Hs01045913_m1 |
| Adipose triglycerides lipase (ATGL)                                  | Hs00386101_m1 |
| Lipid droplet-associated protein (PLIN1)                             | Hs00160173_m1 |
| Tumor necrosis factor alpha (TNFa)                                   | Hs00174128_m1 |
| Interleukin 10 (IL10)                                                | Hs00961622_m1 |
| Adiponectin (ADIP)                                                   | Hs00605917_m1 |
| Leptin (LEP)                                                         | Hs00174877_m1 |
| Macrophage migration inhibitory factor (MIF)                         | Hs00236988_g1 |
| Nuclear factor kappa B (NF-kB)                                       | Hs00765730_m1 |
| Toll like feceptor 4 (TLR4)                                          | Hs01060206_m1 |
| Monocyte chemoattractant protein 1 (MCP1)                            | Hs00234140_m1 |
| Catalase (CAT)                                                       | Hs00156308_m1 |
| Superoxide dismutase (SOD)                                           | Hs00533490_m1 |
| Nitric oxide synthase 3 (NOS3)                                       | Hs01574665_m1 |
| Insulin receptor substrate 1 (IRS1)                                  | Hs00178563_m1 |
| Glucose transporter type 4 (GLUT4)                                   | Hs00168966_m1 |
| Serine/threonine-protein kinase 1 (SMG1)                             | Hs00979691_m1 |
